# Supplementary material for: Use of Arbuscular Mycorrhizal Fungi for Boosting Antioxidant Enzyme Metabolism and Mitigating Saline Stress in Sweet Basil (Ocimum basilicum L.)
Source: MDPI journal article supplement (doi:10.3390/su15075982), 2023-03-30
Supplement: s1 [file s1]

## Supplementary Material

### Use of Arbuscular Mycorrhizal Fungi for Boosting Antioxidant Enzyme Metabolism and Mitigating Saline Stress in Sweet Basil (*Ocimum basilicum* L.)

Abdurrahim Yilmaz <sup>1,\*</sup>, Ertan Yildirim <sup>2</sup>, Hilal Yilmaz <sup>3</sup>, Hakkı Ekrem Soydemir <sup>4</sup>, Emrah Güler <sup>5</sup>, Vahdettin Ciftci <sup>1</sup> and Mehmet Yaman <sup>6</sup>

**Table S1.** ANOVA table according to oxidative stress enzymes and chlorophyll responses of basil plants under different salinity conditions.

| Saline Dose                      |       | APX (mM g fw min <sup>-1</sup> ) | CAT (mM fw min <sup>-1</sup> ) | Chlorophyll content (spad) | H <sub>2</sub> O <sub>2</sub> (μmol g <sup>-1</sup> fw) | MDA (nmolg <sup>-1</sup> fw) | SOD (U g <sup>-1</sup> fw) |
|----------------------------------|-------|----------------------------------|--------------------------------|----------------------------|---------------------------------------------------------|------------------------------|----------------------------|
| 0 mM                             |       | 0.40±0.05c                       | 0.02±0.01c                     | 29.48±2.84a                | 10.37±0.54c                                             | 5.08±0.49c                   | 3.56±0.22b                 |
| 150 mM                           |       | 1.05±0.16b                       | 0.06±0.01b                     | 27.70±1.88a                | 11.70±0.32b                                             | 11.89±2.34b                  | 3.70±0.24b                 |
| 300 mM                           |       | 1.59±0.24a                       | 0.13±0.02a                     | 24.78±1.04b                | 12.76±1.33a                                             | 20.58±3.28a                  | 4.39±0.32a                 |
| Treatment                        |       |                                  |                                |                            |                                                         |                              |                            |
| AMF                              |       | 1.13±0.60a                       | 0.08±0.05a                     | 26.49±1.16a                | 11.17±0.87a                                             | 10.74±5.71a                  | 3.98±0.56a                 |
| Control                          |       | 0.90±0.45a                       | 0.06±0.04a                     | 28.16±3.67a                | 12.05±1.52a                                             | 14.29±7.82a                  | 3.78±0.31a                 |
| Saline Dose × Treatment          |       |                                  |                                |                            |                                                         |                              |                            |
| AMF                              | 0mM   | 0.43±0.03e                       | 0.03±0.00e                     | 27.27±1.76bc               | 10.32±0.61c                                             | 4.69±0.20e                   | 3.40±0.21e                 |
|                                  | 150mM | 1.15±0.07c                       | 0.07±0.01c                     | 26.57±0.46bc               | 11.49±0.11b                                             | 9.81±0.68d                   | 3.91±0.06bc                |
|                                  | 300mM | 1.80±0.10a                       | 0.14±0.01a                     | 25.63±0.25cd               | 11.69±1.00b                                             | 17.72±0.66b                  | 4.64±0.22a                 |
| Control                          | 0mM   | 0.37±0.05e                       | 0.02±0.00e                     | 31.70±1.54a                | 10.41±0.59c                                             | 5.46±0.32e                   | 3.71±0.08cd                |
|                                  | 150mM | 0.94±0.15d                       | 0.06±0.00d                     | 28.83±2.17b                | 11.92±0.33b                                             | 13.98±0.45c                  | 3.49±0.10de                |
|                                  | 300mM | 1.39±0.10b                       | 0.11±0.01b                     | 23.93±0.68d                | 13.82±0.22a                                             | 23.44±1.37a                  | 4.15±0.15b                 |
| ANOVA                            |       |                                  |                                |                            |                                                         |                              |                            |
| <i>F</i> <sub>Salinity</sub>     |       | 247.01***                        | 418.74***                      | 18.53***                   | 27.44***                                                | 697.72***                    | 52.67***                   |
| <i>F</i> <sub>AMF</sub>          |       | 26.44***                         | 46.39***                       | 6.86*                      | 11.21**                                                 | 109.64***                    | 7.8*                       |
| <i>F</i> <sub>AMF×Salinity</sub> |       | 5.56*                            | 5.02*                          | 7.96**                     | 5.7*                                                    | 18.52***                     | 12.97**                    |

Different letters in the same column indicate significant differences according to Student's t-test ( $p \leq 0.05$ ). ns: not significant. \*, \*\*, and\*\*\* indicate significance at  $p \leq 0.05$ , 0.01, and 0.001, respectively.
